# Supplementary material for: Single-centre study surveying neurology trainees’ and faculty’s perceptions of the impact of the COVID-19 pandemic on residents’ medical education
Source: HighWire-hosted journal article supplement (doi:10.1136/bmjno-2021-000184), 2021-12-01
Supplement: bmjno-2021-000184supp001_data_supplement.pdf [file bmjno-2021-000184supp001_data_supplement.pdf]

### Welcome to My Survey

**You are being asked to participate in the study titled "Henry Ford Neurology Residents' Experience During The COVID-19 Pandemic". The objective/purpose of this study is to investigate the impact of the COVID-19 pandemic on our Neurology residents' wellness, education and clinical experience.**

**The following anonymous survey contains questions pertaining to three categories: 1) your own well-being, 2) your redeployment experience on COVID-19 unit (if applicable), and 3) your opinion on the medical education you received during the pandemic.**

**This survey is completely anonymous and confidential. The study investigators will not be able to trace answers back to the respondents. Your participation is entirely voluntary. The information collected from your answers will solely be utilized for the purpose of research and will not be used in any other way; the decision to decline or discontinue study participation will not affect training or employment. Completion of the surveys implies consent to participate in the study.**

**Estimated time for completion: 5-7 minutes**

\* 1. Do you give your consent to participate in the survey?

☐ Yes

☐ No

### Resident/Fellow's Profile

\* 2. Level or training (PGY1 – PGY9)

- ☐ PGY1
- ☐ PGY2
- ☐ PGY3
- ☐ PGY4
- ☐ PGY5
- ☐ PGY6
- ☐ PGY7
- ☐ PGY8
- ☐ PGY9

### Resident/Fellow's Wellness

\* 3. What was **your** stress level during the COVID-19 outbreak?

- ☐ Extremely high
- ☐ High
- ☐ Moderate
- ☐ Low
- ☐ Very low

\* 4. What was **your family**'s stress level during the COVID-19 outbreak?

- ☐ Extremely high
- ☐ High
- ☐ Moderate
- ☐ Low
- ☐ Very low

\* 5. Do you feel it has been the leadership's priority to decrease exposure for neurology residents/fellows whenever possible during this COVID-19 outbreak?

- ☐ The most important priority
- ☐ A top priority, but not the most important
- ☐ Not very important
- ☐ Not important at all

\* 6. How would you rate the support provided by the leadership during the pandemic?

- ☐ Exceeded expectations
- ☐ Met expectations
- ☐ Below expectations

\* 7. Were you aware of how to access emotional support resources?

- ☐ Yes
- ☐ No

\* 8. How satisfied were you with the resources for emotional support made available to you?

- ☐ Very satisfied
- ☐ Satisfied
- ☐ Neither satisfied nor dissatisfied
- ☐ Dissatisfied
- ☐ Very dissatisfied
- ☐ N/A- I was not aware of those resources

\* 9. Did you test positive for COVID-19 or were you suspected to have COVID-19?

- ☐ Yes
- ☐ No

\* 10. If you tested positive or were suspected to have COVID-19, how satisfied were you with the length of time-off you received?

- ☐ Very satisfied
- ☐ Satisfied
- ☐ Neither satisfied nor dissatisfied
- ☐ Dissatisfied
- ☐ Very dissatisfied
- ☐ N/A- Neither tested nor suspected to have COVID

**Resident/Fellow's Redeployment to COVID-19 units**

\* 11. Were you redeployed to a COVID-19 unit?

- ☐ Yes
- ☐ No

\* 12. How satisfied were you with the supervision you received on COVID-19 units?

- ☐ Very satisfied
- ☐ Satisfied
- ☐ Neither satisfied nor dissatisfied
- ☐ Dissatisfied
- ☐ Very dissatisfied
- ☐ N/A- I was not redeployed to a COVID unit

\* 13. How satisfied were you with the availability and quality of disinfectants and PPE (gowns, masks, gloves, eye shields etc.) on COVID-19 units?

- ☐ Very satisfied
- ☐ Satisfied
- ☐ Neither satisfied nor dissatisfied
- ☐ Dissatisfied
- ☐ Very dissatisfied
- ☐ N/A- I was not redeployed to a COVID unit

\* 14. Whether deployed to a COVID unit or not, do you agree with the statement "the amount of work was overwhelming during the pandemic"?

- ☐ Strongly agree
- ☐ Agree
- ☐ Neither agree nor disagree
- ☐ Disagree
- ☐ Strongly disagree

\* 15. How satisfied were you with the efforts made by the supervising faculty to decrease your exposure while on COVID-19 units?

- ☐ Very satisfied
- ☐ Satisfied
- ☐ Neither satisfied nor dissatisfied
- ☐ Dissatisfied
- ☐ Very dissatisfied
- ☐ N/A- I was not redeployed to a COVID unit

\* 16. How satisfied were you with the level of support provided by the nursing staff on COVID-19 units?

- ☐ Very satisfied
- ☐ Satisfied
- ☐ Neither satisfied nor dissatisfied
- ☐ Dissatisfied
- ☐ Very dissatisfied
- ☐ N/A- I was not redeployed to a COVID unit

\* 17. Did you violate clinical work hours during the pandemic?

- ☐ Yes
- ☐ No

\* 18. Did you find your time during COVID-19 redeployment to be fulfilling?

- ☐ A great deal
- ☐ A lot
- ☐ Moderately
- ☐ A little
- ☐ Not at all
- ☐ N/A- I was not redeployed to a COVID unit

**Resident/Fellow's Medical Education**

\* 19. During COVID-19 pandemic, how often were you able to attend didactics virtually?

- ☐ Always
- ☐ Close to 75%
- ☐ Close to 50%
- ☐ Close to 25%
- ☐ Never

\* 20. How satisfied were you with the convenience of attending lectures virtually?

- ☐ Very satisfied
- ☐ Satisfied
- ☐ Neither satisfied nor dissatisfied
- ☐ Dissatisfied
- ☐ Very dissatisfied
- ☐ N/A- I did not attend virtual lectures

\* 21. Were you provided with on-line resources (AAN resources, PowerPoints, electronic modules) to use during the pandemic?

- ☐ Yes
- ☐ No

\* 22. In a typical week during the pandemic, whether at work or outside of work, how often would you access the aforementioned on-line resources provided?

- ☐ Every day
- ☐ 5-6 days
- ☐ 3-4 days
- ☐ 1-2 days
- ☐ Never

\* 23. How satisfied were you with the electronic quizzes designed to guide your education?

- ☐ Very satisfied
- ☐ Satisfied
- ☐ Neither satisfied nor dissatisfied
- ☐ Dissatisfied
- ☐ Very dissatisfied
- ☐ N/A- I did not receive such quizzes

\* 24. How satisfied were you with the audio/video quality of the virtual lectures?

- ☐ Very satisfied
- ☐ Satisfied
- ☐ Neither satisfied nor dissatisfied
- ☐ Dissatisfied
- ☐ Very dissatisfied
- ☐ N/A- I did not attend virtual lectures

\* 25. Which platform used did you prefer? Zoom, Skype or Other.

- ☐ Zoom
- ☐ Skype for Business
- ☐ N/A
- ☐ Other (please specify)

\* 26. How interested would you be to utilize virtual lectures for off-site rotations?

- ☐ Extremely interested- it is essential
- ☐ Very interested- it is helpful but not essential
- ☐ Somewhat interested
- ☐ Not so interested- it is not useless but has limited usefulness
- ☐ Not at all interested- it is useless



\* 27. How interested would you be to continue receiving certain teaching opportunities virtually after the pandemic resolves?

- ☐ Extremely interested- it is essential
- ☐ Very interested- it is helpful but not essential
- ☐ Somewhat interested
- ☐ Not so interested- it is not useless but has limited usefulness
- ☐ Not at all interested- it is useless

### Resident/Fellow's Performance

\* 28. How satisfied are you overall with your performance as a resident/fellow during the pandemic?

- ☐ Very satisfied
- ☐ Satisfied
- ☐ Neither satisfied nor dissatisfied
- ☐ Dissatisfied
- ☐ Very dissatisfied

\* 29. Describe how the pandemic has affected your overall experience as a resident.

- ☐ It was a positive experience- a fulfilling and inspiring one
- ☐ It was a neutral experience- I am indifferent
- ☐ It was a negative experience- a stressful and compromising one

\* 30. In what **positive** ways has the pandemic contributed to your experience? (Choose all that apply)

- ☐ Increased maturity level
- ☐ Solidarity/teamwork
- ☐ Greater clinical competence
- ☐ Expanded medical knowledge/skills
- ☐ Heightened assertiveness
- ☐ Enhanced empathy
- ☐ Increased productivity
- ☐ None

\* 31. In what negative ways has the pandemic contributed to your experience? (Choose all that apply)

- ☐ Increased stress level
- ☐ Fatigue
- ☐ Fear/anxiety
- ☐ Decreased sleep
- ☐ Decreased self confidence
- ☐ Feeling overwhelmed
- ☐ Hopelessness
- ☐ Decreased productivity
- ☐ None

\* 32. Are you a graduating resident/fellow?

- ☐ Yes
- ☐ No

\* 33. How much do you think the pandemic has affected your readiness to graduate on time?

- ☐ I have missed crucial parts of my training and I am not ready to graduate on time
- ☐ I have missed some part of my training and I am concerned about graduating on time
- ☐ It has somewhat affected by training but I am not concerned about graduating on time
- ☐ It has not affected my training to any significant extent and I am not concerned about graduating on time
- ☐ It has not compromised my training whatsoever and I am ready to graduate on time
- ☐ N/A- I am not graduating this year

### End of survey

34. Please provide us with any additional comments or concerns.

This marks the end of your participation to the survey. Thank you very much.
