# Supplementary material for: Single-centre study surveying neurology trainees’ and faculty’s perceptions of the impact of the COVID-19 pandemic on residents’ medical education
Source: HighWire-hosted journal article supplement (doi:10.1136/bmjno-2021-000184), 2021-12-01
Supplement: bmjno-2021-000184supp003_data_supplement.pdf [file bmjno-2021-000184supp003_data_supplement.pdf]

Supplemental table 3. Trainees survey with detailed questions and responses.

| Question                                                                                                                                                | Response                                   | Trainees Response (N= 17) |
|---------------------------------------------------------------------------------------------------------------------------------------------------------|--------------------------------------------|---------------------------|
| What was your stress level during the COVID-19 outbreak?                                                                                                | Extremely high                             | 0 (0%)                    |
|                                                                                                                                                         | High                                       | 8 (47%)                   |
|                                                                                                                                                         | Moderate                                   | 8 (47%)                   |
|                                                                                                                                                         | Low                                        | 1 (6%)                    |
|                                                                                                                                                         | Very low                                   | 0 (0%)                    |
| What was your family's stress level during the COVID-19 outbreak?                                                                                       | Extremely high                             | 4 (24%)                   |
|                                                                                                                                                         | High                                       | 8 (47%)                   |
|                                                                                                                                                         | Moderate                                   | 5 (29%)                   |
|                                                                                                                                                         | Low                                        | 0 (0%)                    |
|                                                                                                                                                         | Very low                                   | 0 (0%)                    |
| Do you feel it has been the leadership's priority to decrease exposure for neurology residents/fellows whenever possible during this COVID-19 outbreak? | A top priority, but not the most important | 8 (47%)                   |
|                                                                                                                                                         | The most important priority                | 9 (53%)                   |
|                                                                                                                                                         | Not very important                         | 0 (0%)                    |
|                                                                                                                                                         | Not important at all                       | 0 (0%)                    |
| How would you rate the support provided by the leadership during the pandemic?                                                                          | Exceeded expectations                      | 10 (59%)                  |
|                                                                                                                                                         | Met expectations                           | 7 (41%)                   |
|                                                                                                                                                         | Below expectation                          | 0 (0%)                    |
| Were you aware of how to access emotional support resources?                                                                                            | Yes                                        | 17 (100%)                 |
|                                                                                                                                                         | No                                         | 0 (0%)                    |
| How satisfied were you with the resources for emotional support made available to you?                                                                  | Very dissatisfied                          | 0 (0%)                    |
|                                                                                                                                                         | Dissatisfied                               | 0 (0%)                    |
|                                                                                                                                                         | Neither satisfied nor dissatisfied         | 3 (18%)                   |
|                                                                                                                                                         | Satisfied                                  | 9 (53%)                   |
|                                                                                                                                                         | Very satisfied                             | 5 (29%)                   |
| How satisfied were you with the supervision you received on COVID-19 units? <sup>1</sup>                                                                | Satisfied                                  | 4 (44%)                   |
|                                                                                                                                                         | Very satisfied                             | 5 (56%)                   |
|                                                                                                                                                         | Neither satisfied nor dissatisfied         | 0 (0%)                    |

|                                                                                                                                                            |                                    |           |
|------------------------------------------------------------------------------------------------------------------------------------------------------------|------------------------------------|-----------|
|                                                                                                                                                            | Dissatisfied                       | 0 (0%)    |
|                                                                                                                                                            | Very dissatisfied                  | 0 (0%)    |
| How satisfied were you with the availability and quality of disinfectants and PPE (gowns, masks, gloves, eye shields etc.) on COVID-19 units? <sup>1</sup> | Very dissatisfied                  | 0 (0%)    |
|                                                                                                                                                            | Dissatisfied                       | 0 (0%)    |
|                                                                                                                                                            | Neither satisfied nor dissatisfied | 1 (11%)   |
|                                                                                                                                                            | Satisfied                          | 6 (67%)   |
|                                                                                                                                                            | Very satisfied                     | 2 (22%)   |
| How satisfied were you with the efforts made by the supervising faculty to decrease your exposure while on COVID-19 units? <sup>1</sup>                    | Very dissatisfied                  | 0 (0%)    |
|                                                                                                                                                            | Dissatisfied                       | 0 (0%)    |
|                                                                                                                                                            | Neither satisfied nor dissatisfied | 0 (0%)    |
|                                                                                                                                                            | Satisfied                          | 3 (33%)   |
|                                                                                                                                                            | Very satisfied                     | 6 (67%)   |
| How satisfied were you with the level of support provided by the nursing staff on COVID-19 units? <sup>1</sup>                                             | Satisfied                          | 5 (56%)   |
|                                                                                                                                                            | Very satisfied                     | 4 (44%)   |
|                                                                                                                                                            | Neither satisfied nor dissatisfied | 0 (0%)    |
|                                                                                                                                                            | Dissatisfied                       | 0 (0%)    |
|                                                                                                                                                            | Very dissatisfied                  | 0 (0%)    |
| Did you find your time during COVID-19 redeployment to be fulfilling? <sup>1</sup>                                                                         | A great deal                       | 2 (22%)   |
|                                                                                                                                                            | A lot                              | 4 (44%)   |
|                                                                                                                                                            | Moderately                         | 3 (33%)   |
|                                                                                                                                                            | A little                           | 0 (0%)    |
|                                                                                                                                                            | Not at all                         | 0 (0%)    |
| Did you violate clinical work hours during the pandemic?                                                                                                   | No                                 | 17 (100%) |
|                                                                                                                                                            | Yes                                | 0 (0%)    |
| Whether deployed to a COVID unit or not, do you agree with the statement "the amount of work was overwhelming during the pandemic"?                        | Strongly agree                     | 0 (0%)    |
|                                                                                                                                                            | Agree                              | 2 (12%)   |
|                                                                                                                                                            | Neither agree nor disagree         | 7 (41%)   |
|                                                                                                                                                            | Disagree                           | 5 (29%)   |
|                                                                                                                                                            | Strongly disagree                  | 3 (18%)   |
| During COVID-19 pandemic, how often were you able to attend didactics virtually?                                                                           | Always                             | 4 (24%)   |
|                                                                                                                                                            | Close to 75%                       | 10 (59%)  |
|                                                                                                                                                            | Close to 50%                       | 2 (12%)   |

|                                                                                                                                                      |                                                                 |          |
|------------------------------------------------------------------------------------------------------------------------------------------------------|-----------------------------------------------------------------|----------|
|                                                                                                                                                      | Close to 25%                                                    | 1 (6%)   |
|                                                                                                                                                      | Never                                                           | 0 (0%)   |
| How satisfied were you with the convenience of attending lectures virtually?                                                                         | Very dissatisfied                                               | 0 (0%)   |
|                                                                                                                                                      | Dissatisfied                                                    | 2 (12%)  |
|                                                                                                                                                      | Neither satisfied nor dissatisfied                              | 1 (6%)   |
|                                                                                                                                                      | Satisfied                                                       | 10 (59%) |
|                                                                                                                                                      | Very satisfied                                                  | 4 (24%)  |
| Were you provided with on-line resources (AAN resources, PowerPoints, electronic modules) to use during the pandemic?                                | Yes                                                             | 16 (94%) |
|                                                                                                                                                      | No                                                              | 1 (6%)   |
| In a typical week during the pandemic, whether at work or outside of work, how often would you access the aforementioned on-line resources provided? | 1-2 days                                                        | 5 (29%)  |
|                                                                                                                                                      | 3-4 days                                                        | 8 (47%)  |
|                                                                                                                                                      | 5-6 days                                                        | 3 (18%)  |
|                                                                                                                                                      | Never                                                           | 1 (6%)   |
| How satisfied were you with the electronic quizzes designed to guide your education?                                                                 | N/A- I did not receive such quizzes                             | 5 (29%)  |
|                                                                                                                                                      | Very dissatisfied                                               | 0 (0%)   |
|                                                                                                                                                      | Dissatisfied                                                    | 0 (0%)   |
|                                                                                                                                                      | Neither satisfied nor dissatisfied                              | 2 (12%)  |
|                                                                                                                                                      | Satisfied                                                       | 7 (41%)  |
| How satisfied were you with the audio/video quality of the virtual lectures?                                                                         | Very satisfied                                                  | 3 (18%)  |
|                                                                                                                                                      | N/A- I did not attend virtual lectures                          | 1 (6%)   |
|                                                                                                                                                      | Very dissatisfied                                               | 0 (0%)   |
|                                                                                                                                                      | Dissatisfied                                                    | 0 (0%)   |
|                                                                                                                                                      | Neither satisfied nor dissatisfied                              | 1 (6%)   |
| How interested would you be to utilize virtual lectures for off-site rotations?                                                                      | Satisfied                                                       | 10 (59%) |
|                                                                                                                                                      | Very satisfied                                                  | 5 (29%)  |
|                                                                                                                                                      | Not at all interested- it is useless                            | 0 (0%)   |
|                                                                                                                                                      | Not so interested- it is not useless but has limited usefulness | 1 (6%)   |
|                                                                                                                                                      | Somewhat interested                                             | 2 (12%)  |
|                                                                                                                                                      | Very interested- it is helpful but not essential                | 7 (41%)  |
|                                                                                                                                                      | Extremely interested- it is essential                           | 7 (41%)  |

|                                                                                                                         |                                                                 |          |
|-------------------------------------------------------------------------------------------------------------------------|-----------------------------------------------------------------|----------|
| How interested would you be to continue receiving certain teaching opportunities virtually after the pandemic resolves? | Not at all interested- it is useless                            | 0 (0%)   |
|                                                                                                                         | Not so interested- it is not useless but has limited usefulness | 3 (18%)  |
|                                                                                                                         | Somewhat interested                                             | 2 (12%)  |
|                                                                                                                         | Very interested- it is helpful but not essential                | 5 (29%)  |
|                                                                                                                         | Extremely interested- it is essential                           | 7 (41%)  |
| How satisfied are you overall with your performance as a resident/fellow during the pandemic?                           | Dissatisfied                                                    | 0 (0%)   |
|                                                                                                                         | Neither satisfied nor dissatisfied                              | 1 (6%)   |
|                                                                                                                         | Satisfied                                                       | 12 (71%) |
|                                                                                                                         | Very satisfied                                                  | 4 (24%)  |
| Describe how the pandemic has affected your overall experience as a resident.                                           | It was a negative experience- a stressful and compromising one  | 3 (18%)  |
|                                                                                                                         | It was a neutral experience- I am indifferent                   | 4 (24%)  |
|                                                                                                                         | It was a positive experience- a fulfilling and inspiring one    | 10 (59%) |
